# Supplementary material for: HEPES-involved hydrothermal synthesis of Fe3O4nanoparticles and their biological application
Source: Royal Society of Chemistry journal article supplement (doi:10.1039/c4ra12536c), 2014-12-11
Supplement: c4ra12536c1.pdf [file c4ra12536c1.pdf]

## Supporting Information

for

# HEPES-involved Hydrothermal Synthesis of Fe<sub>3</sub>O<sub>4</sub> Nanoparticles and Their Biological Application

Hui Li, Zhong Lu, Gang Cheng, Kaifeng Rong, Fengxi Chen, and Rong Chen\*

School of Chemistry and Environmental Engineering and Key Laboratory for Green Chemical Process  
of Ministry of Education, Wuhan Institute of Technology, Wuhan, 430073, PR China

\* To whom correspondence should be addressed. Prof. R. Chen, E-mail: [rchenhku@hotmail.com](mailto:rchenhku@hotmail.com)

Tel.: (+86)13659815698; fax: (+86) 2787195671.

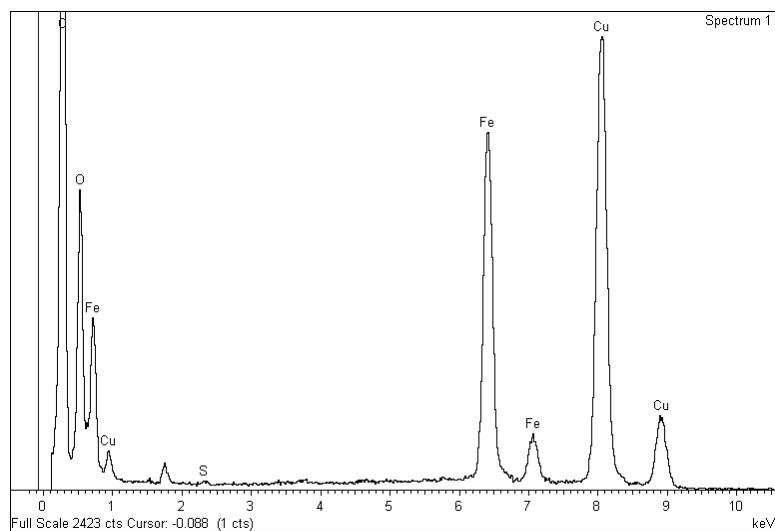

**Figure S1.** The EDX spectrum of  $\text{Fe}_3\text{O}_4$  nanoparticles prepared by hydrothermal method from  $\text{FeCl}_2$  precursor in HEPES buffer solution when HEPES/ $\text{FeCl}_2$  molar ratio was 1:1 (S1).

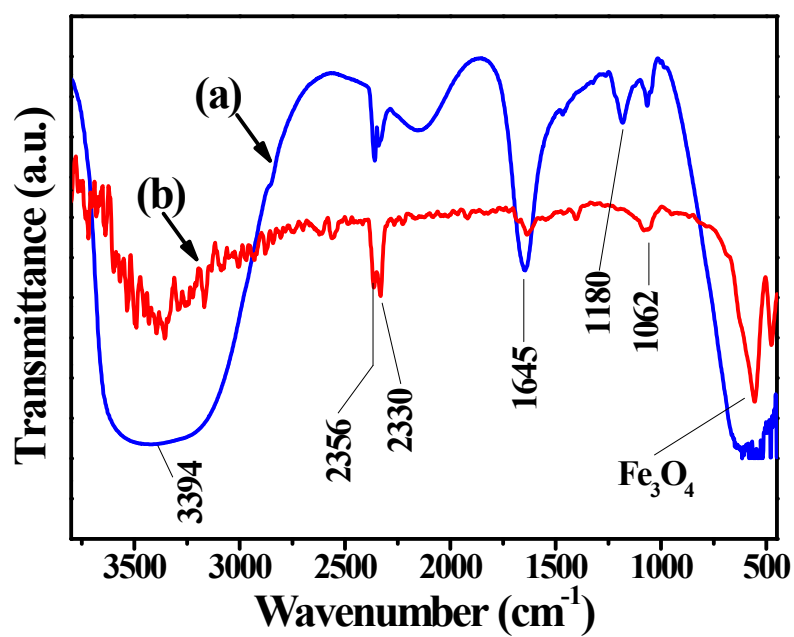

**Figure S2.** FT-IR spectra of HEPES (a) and the as-synthesized Fe<sub>3</sub>O<sub>4</sub> nanoparticle (S1) (b).

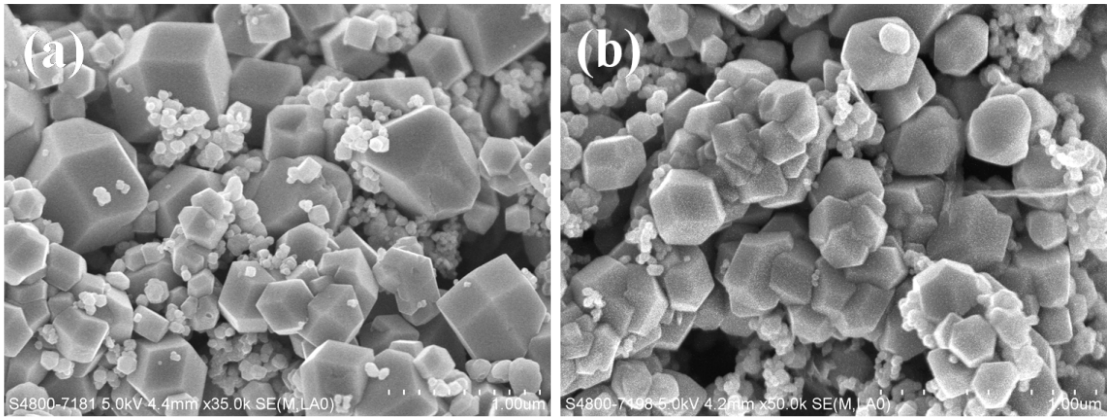

**Figure S3.** SEM images of the as-prepared products synthesized with the different molar ratio of HEPES and Fe of 2 (a, **S3**) and 5 (b, **S4**), respectively.

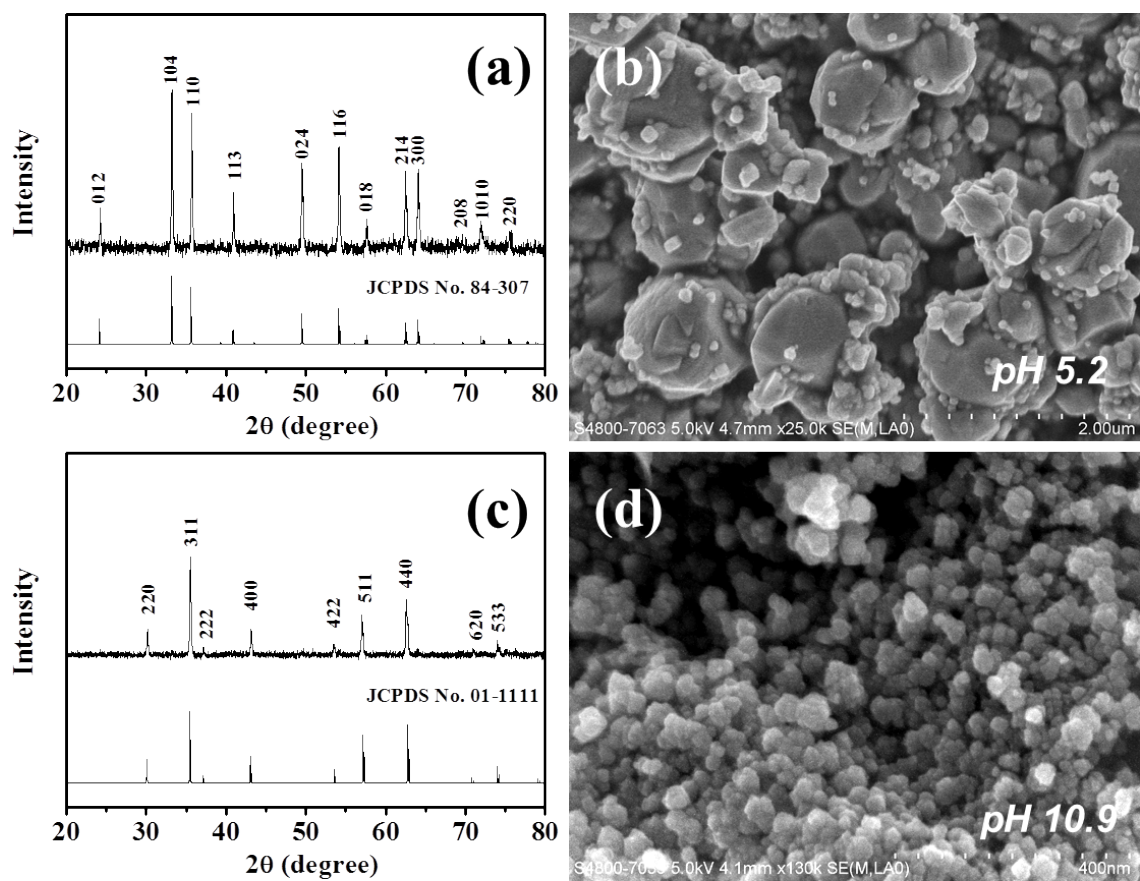

**Figure S4.** XRD patterns and SEM images of the as-prepared products in HEPES solutions with different pH values (a and b: S5; c and d: S6).

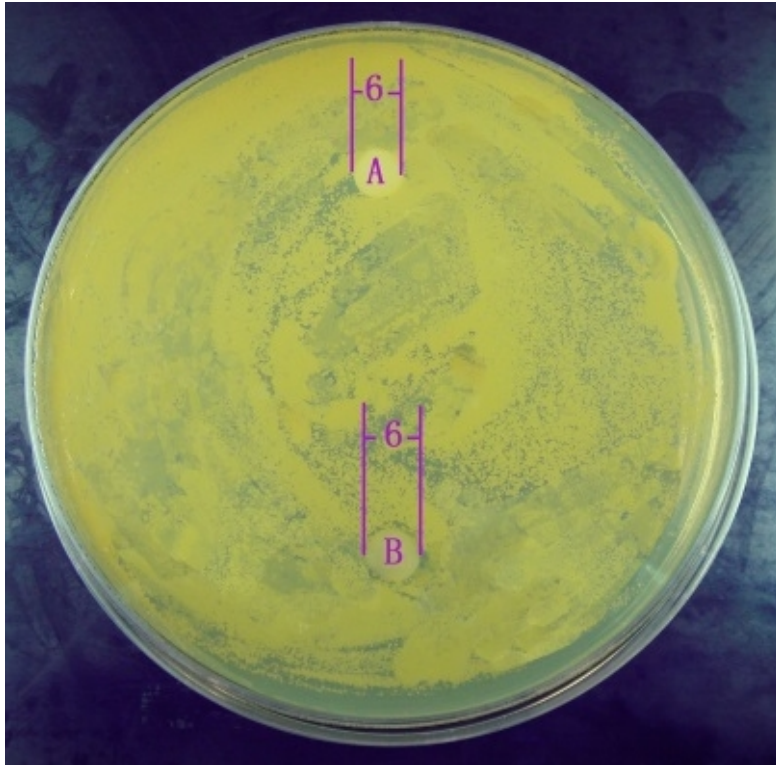

**Figure S5.** Agar plates of *S. aureus* bacterial growth in the presence of  $\text{Fe}_3\text{O}_4$  nanoparticles.
